# Supplementary material
Source: PubMed Central journal article supplement (PMC7103397)

EGFP-nucleolin

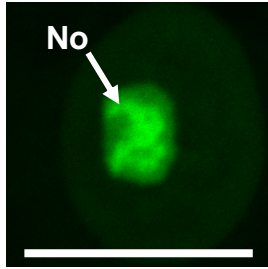

EGFP-fibrillarin

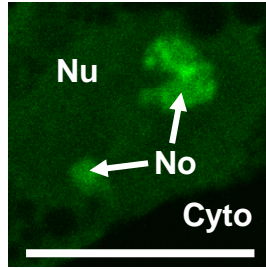

EGFP-B23.1

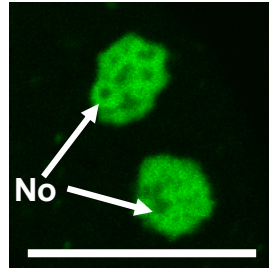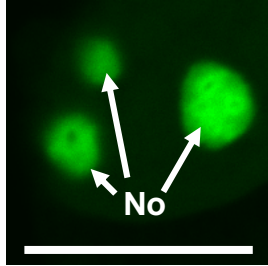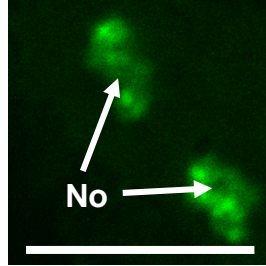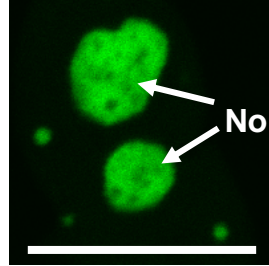

EGFP-N

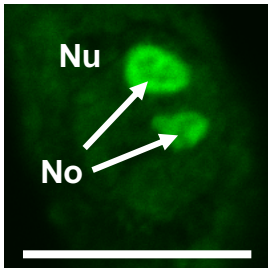

EGFP-ORF57

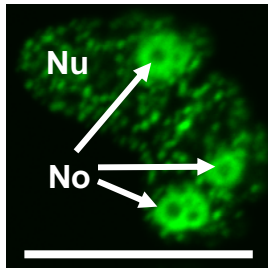

EGFP-Rev

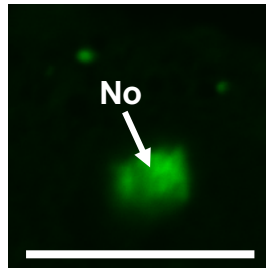

EGFP-N<sub>ΔNoLS/ORF57</sub>

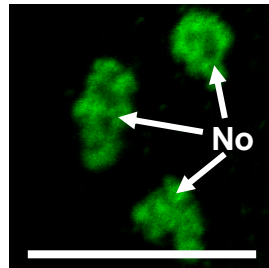

EGFP-ORF57<sub>ΔNoLS/Rev</sub>

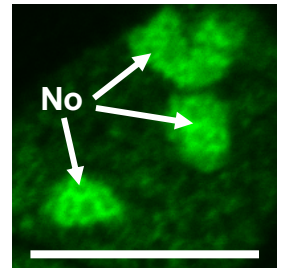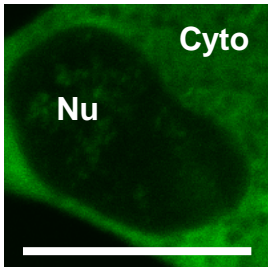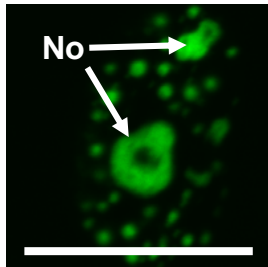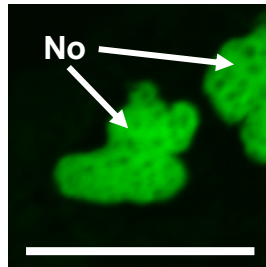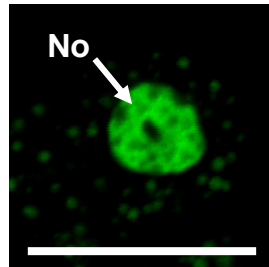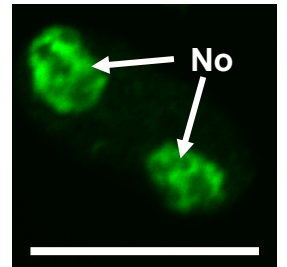

Supplement: mmc1.pdf [file mmc1.pdf]
