# Supplementary material
Source: PubMed Central journal article supplement (PMC7103397)

EGFP-nucleolin    EGFP-fibrillarin    EGFP-B23.1

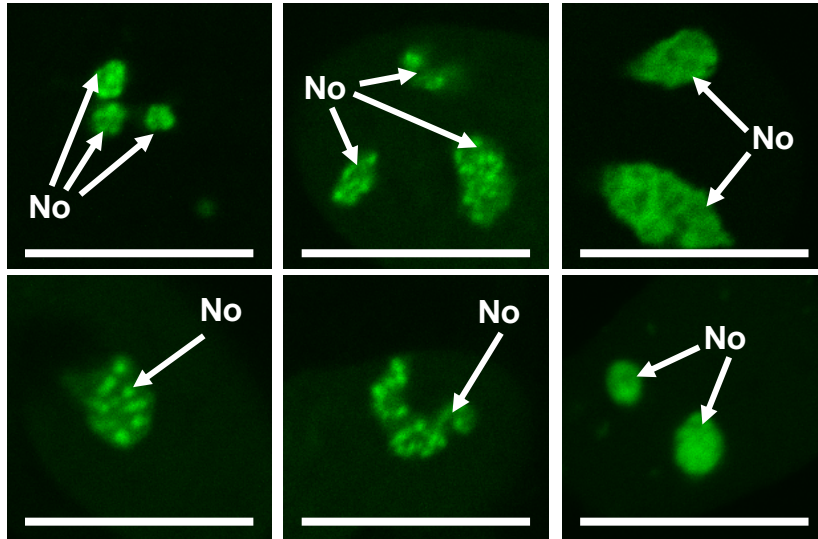

EGFP-N

EGFP-ORF57

EGFP-Rev

EGFP-N<sub>ΔNoLS/ORF57</sub>

EGFP-ORF57<sub>ΔNoLS/Rev</sub>

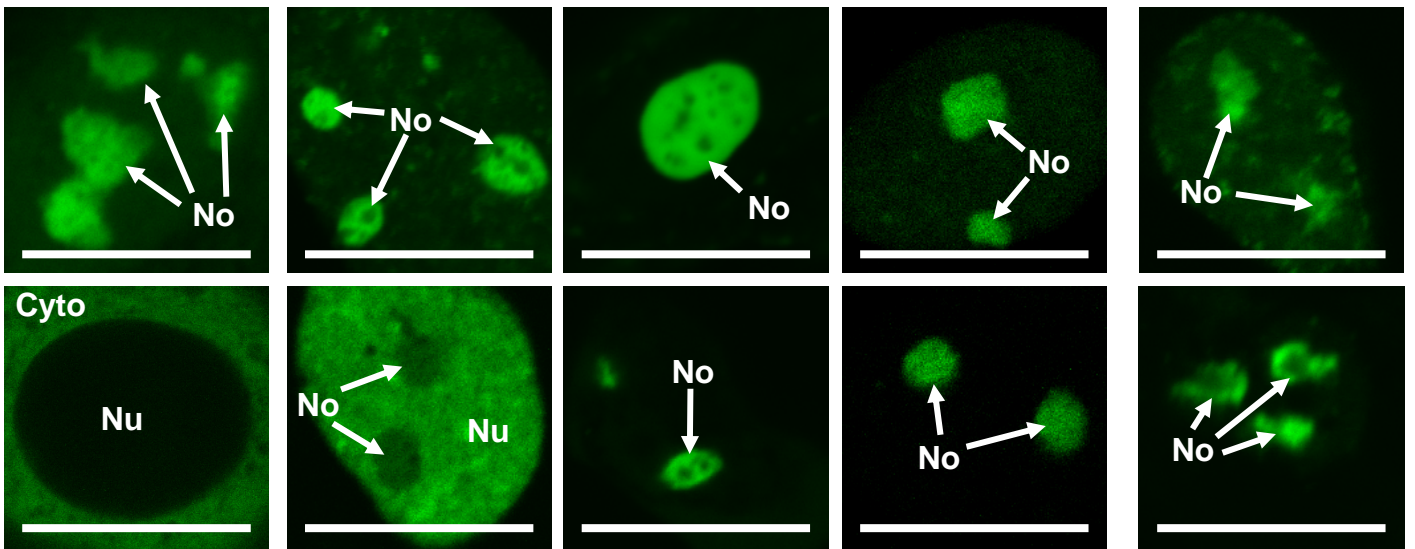

Supplement: mmc2.pdf [file mmc2.pdf]
