# Supplementary material
Source: PubMed Central journal article supplement (PMC7103397)

EGFP-nucleolin EGFP-fibrillarin EGFP-B23.1

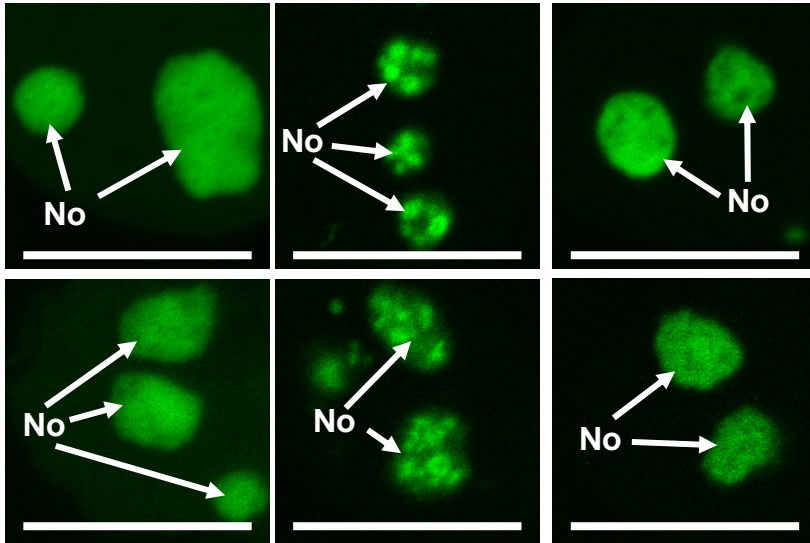

EGFP-N

EGFP-ORF57

EGFP-Rev

EGFP-N<sub>ΔNoLS/ORF57</sub> EGFP-ORF57<sub>ΔNoLS/Rev</sub>

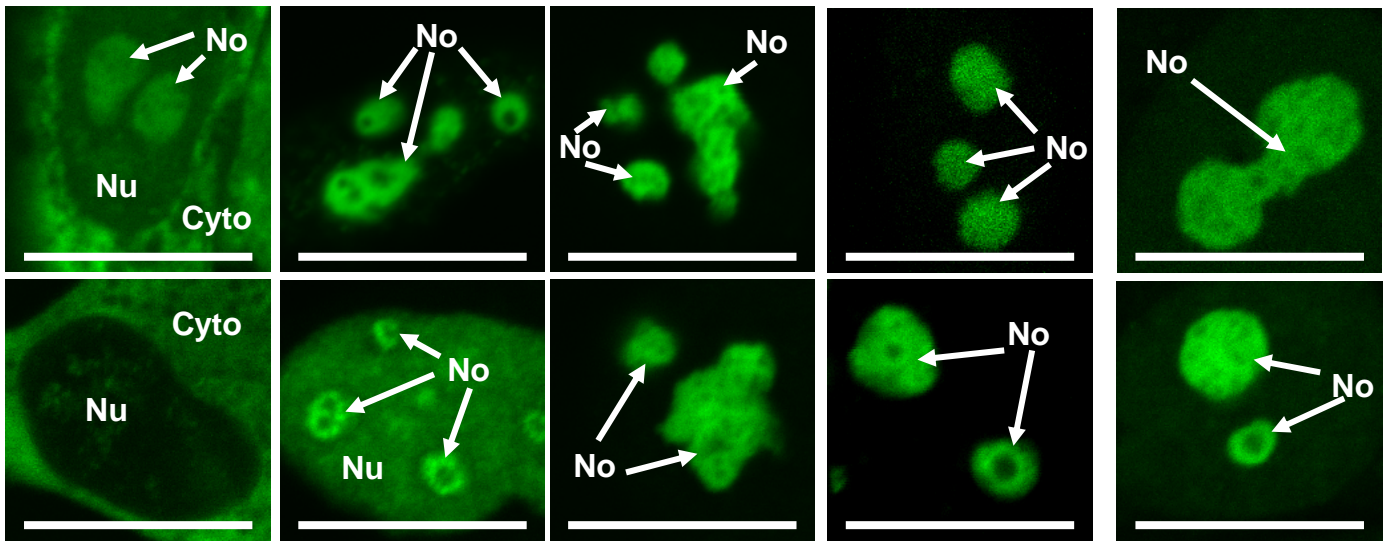

Supplement: mmc3.pdf [file mmc3.pdf]
